# Supplementary material for: A general method for the incorporation of nanoparticles into superhydrophobic films by aerosol assisted chemical vapour deposition
Source: Royal Society of Chemistry journal article supplement (doi:10.1039/c3ta01629c), 2013-01-01
Supplement: c3ta01629c.pdf [file c3ta01629c.pdf]

## **“A general method for the incorporation of nanoparticles into superhydrophobic films by Aerosol Assisted Chemical Vapour Deposition (AACVD)”**

Colin R. Crick<sup>[1]</sup>, Joseph C. Bear<sup>[1]</sup>, Paul Southern<sup>[2]</sup> and Ivan P. Parkin<sup>[1]\*</sup>

[1] Materials Chemistry Research Centre, Department of Chemistry, University College London, 20 Gordon Street, London, WC1H 0AJ, UK.

[2] Royal Institution of Great Britain, Davy Faraday Research Laboratory, London, W1S 4BS, UK.

### **Supporting Information**

#### **1. Magnetic moment calculations from SQUID data:**

Saturation magnetisation of Fe<sub>3</sub>O<sub>4</sub> + film (0.7 mg) = 0.00137 emu

Saturation magnetisation of Fe<sub>3</sub>O<sub>4</sub> powder (1.6 mg) = 0.06749 emu (42.2 emu/g)

Mass of Fe<sub>3</sub>O<sub>4</sub> in polymer film = 0.06749 emu / 42.2 emu = 0.0325 mg

% concentration by mass = 0.0325 mg / 0.7mg = 4.6%

A saturation magnetisation of 42.2 emu/g was determined for the Fe<sub>3</sub>O<sub>4</sub> powder giving an estimated mass concentration of 4.6 % in the polymer film.

## **2. TEM,EDX and HRTEM analysis for various nanoparticle/nanoparticle-Sylgard films:**

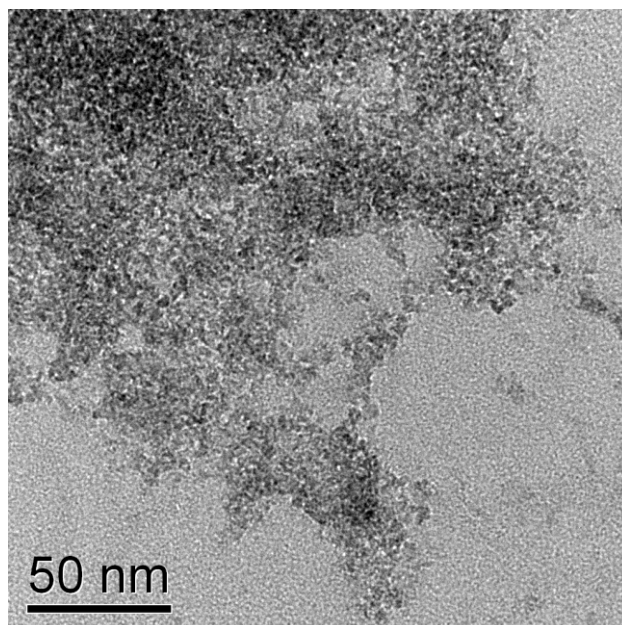

**Figure S1.** Transmission electron microscope (TEM) image of chemically synthesised oleic acid functionalised anatase nanoparticles

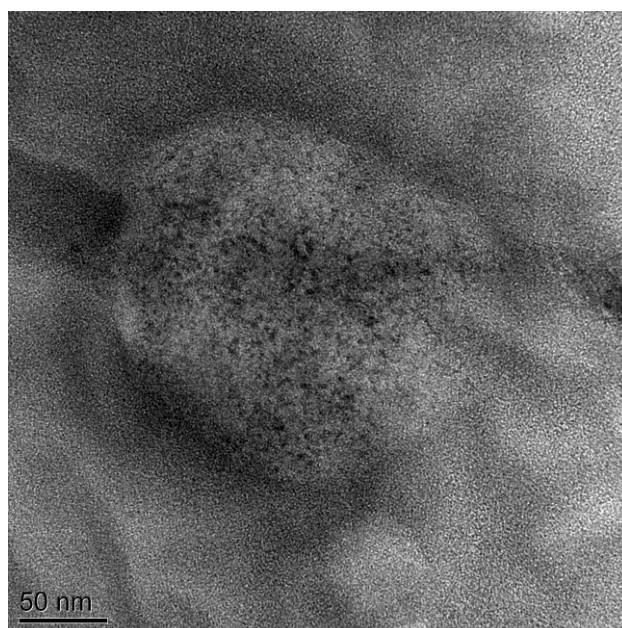

**Figure S2.** Transmission electron microscope (TEM) image of the titania nanoparticles incorporated into the Sylgard film. The dark areas represent the  $\text{TiO}_2$  NPs.

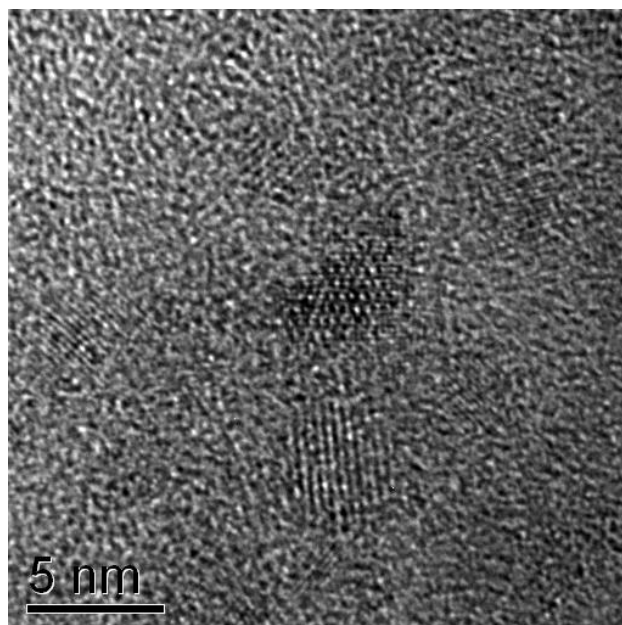

**Figure S3.** HRTEM image of chemically synthesised TiO<sub>2</sub> nanoparticles

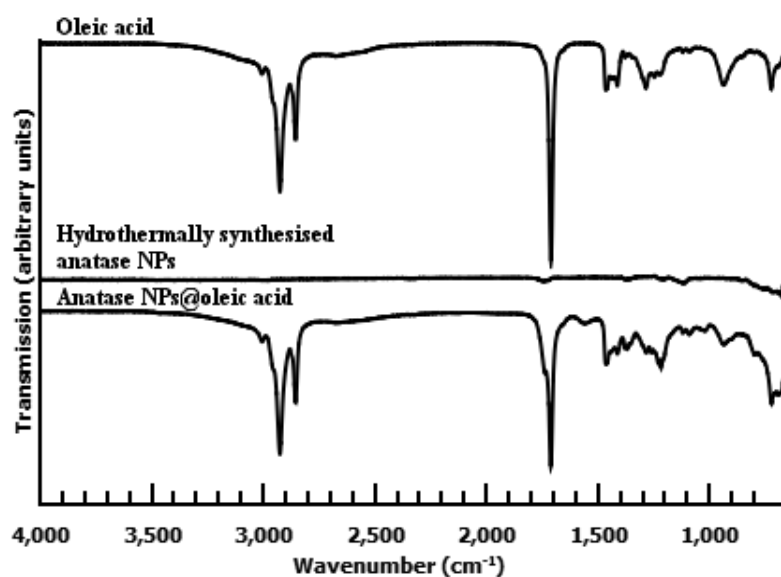

**Figure S4.** Infrared (IR) spectra of hydrothermally synthesised TiO<sub>2</sub> nanoparticles, showing oleic acid functionalisation

**Figure S5.** EDX spectra of chemically synthesised TiO<sub>2</sub> nanoparticles (top) and in the Sylgard film (bottom)

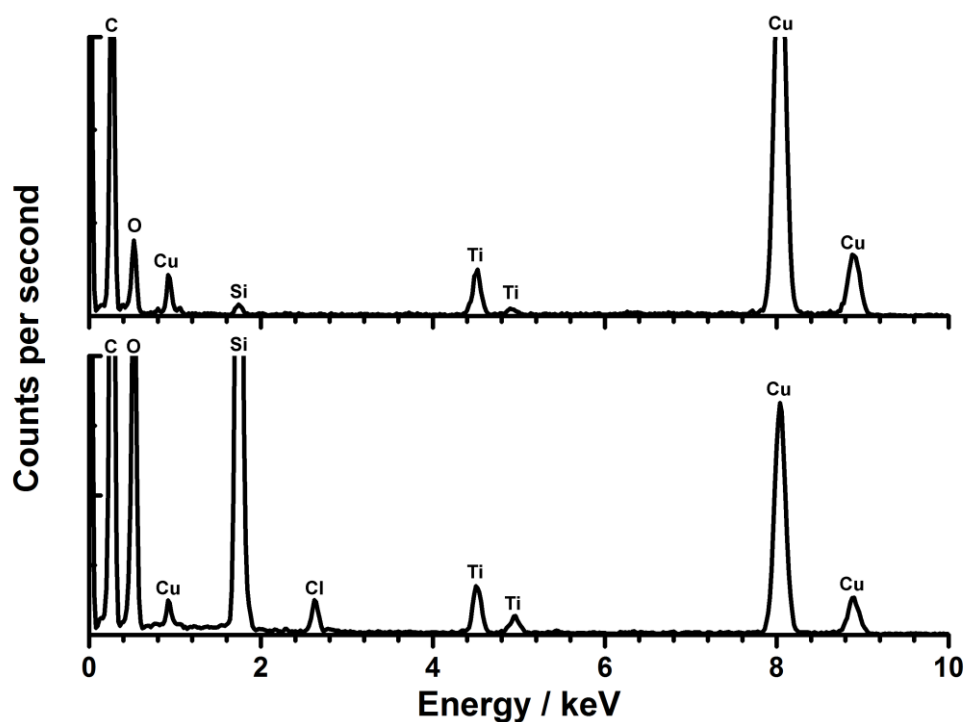

ard film (bottom)

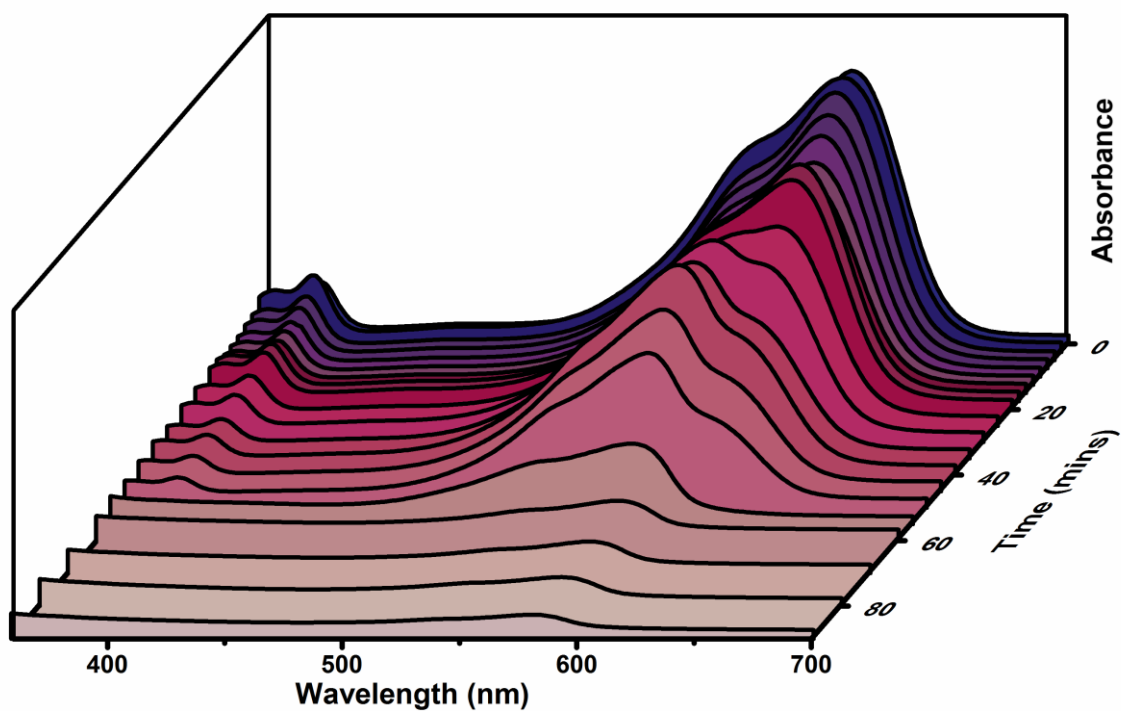

**Figure S6.** UV/vis composite mapping the degradation of Resazurin sodium salt (Aldrich, BioReagent) dye over time when placed on a TiO<sub>2</sub> nanoparticle siloxane film when exposed to 254nm radiation.

azurin sodium salt (Aldrich, BioReagent) dye over time when placed on a TiO<sub>2</sub> nanoparticle siloxane film when exposed to 254nm radiation.

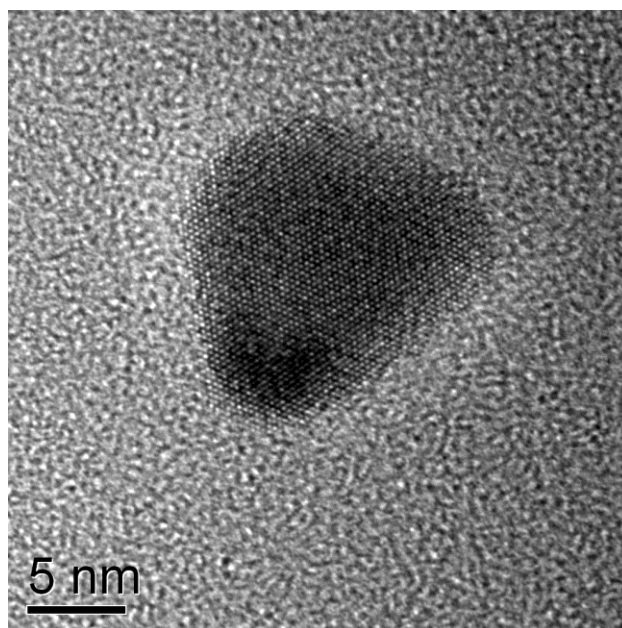

**Figure S7.** HRTEM image of a single CoO nanocrystal

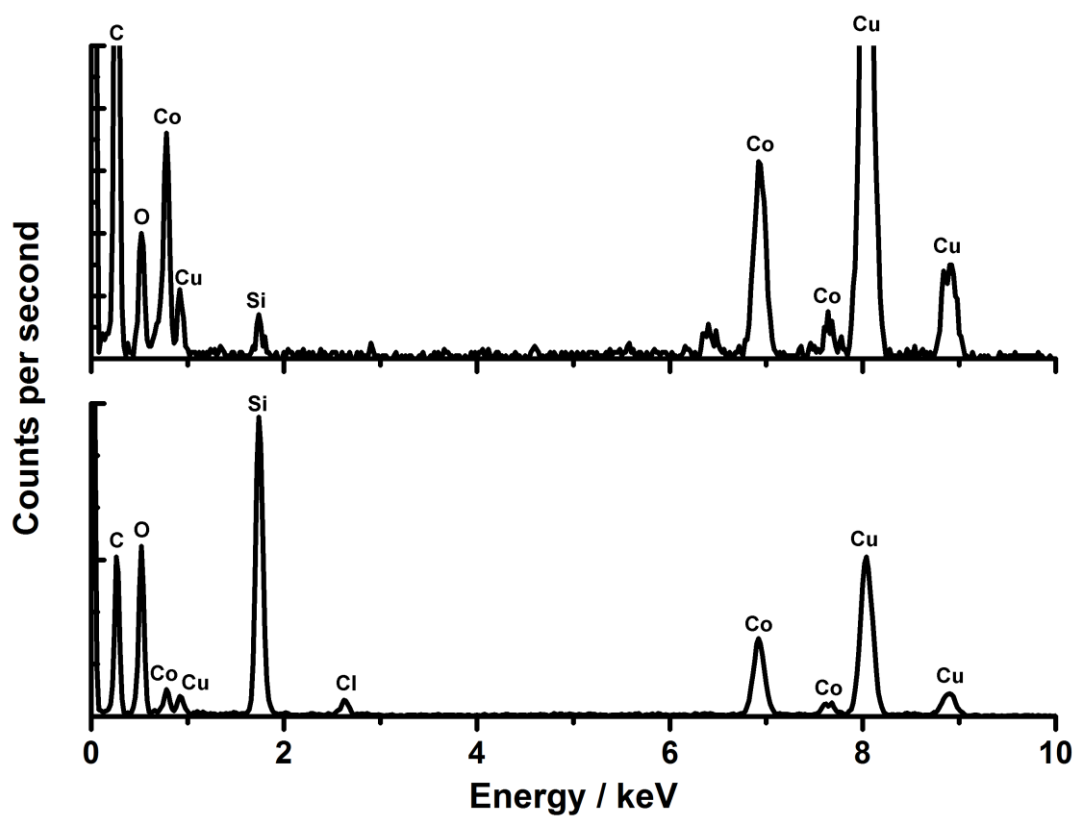

**Figure S8.** EDX spectra of CoO nanoparticles (top) and in the Sylgard film (bottom)

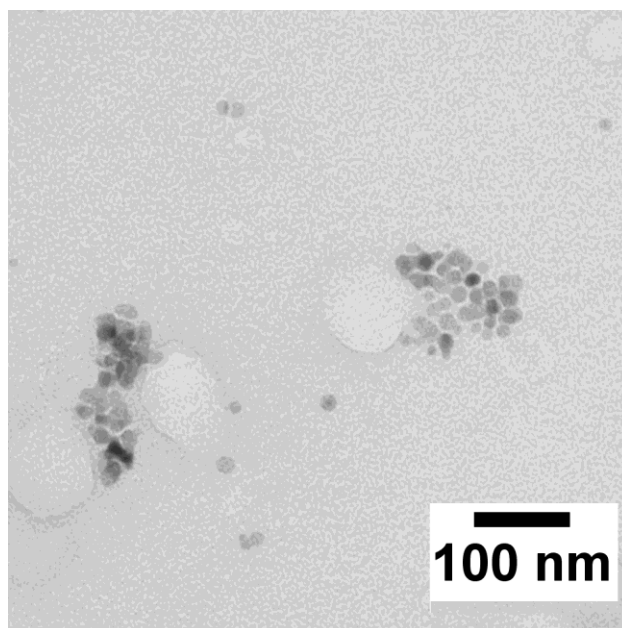

**Figure S9.** TEM image of Au nanoparticles synthesised using the Brüst method

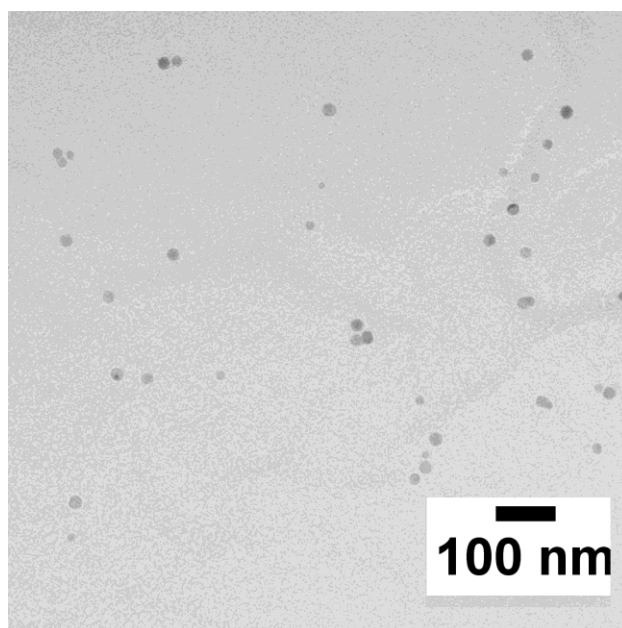

**Figure S10.** TEM image of hydrophobised silica coated Au nanoparticles after hydrophobation with trimethoxy(octadecyl) silane

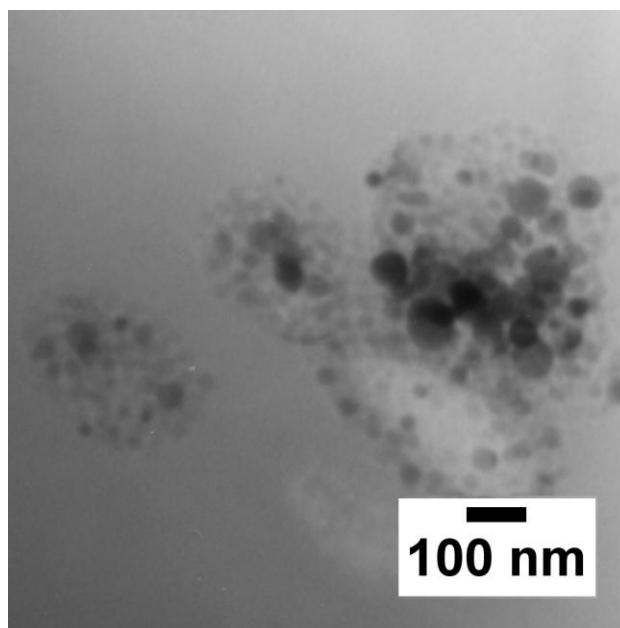

**Figure S11.** TEM image of silica coated Au nanoparticles in the Sylgard film

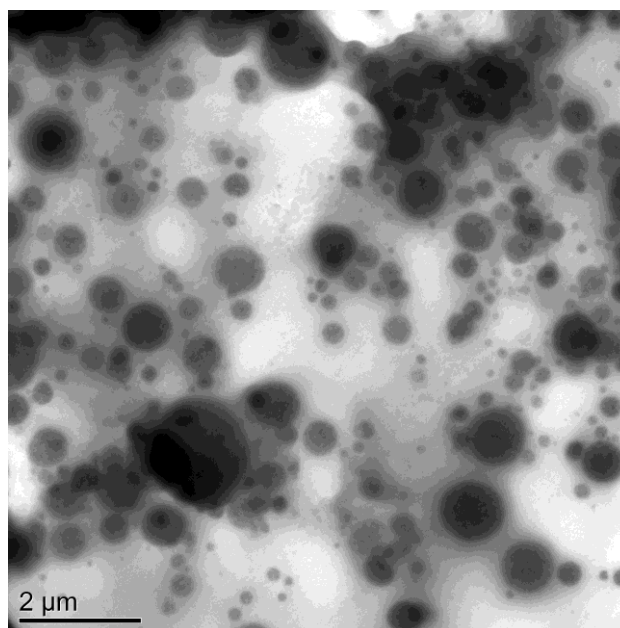

**Figure S12.** TEM image of clusters of  $\text{Fe}_3\text{O}_4$  nanoparticles in the Sylgard film showing their distribution throughout the surface

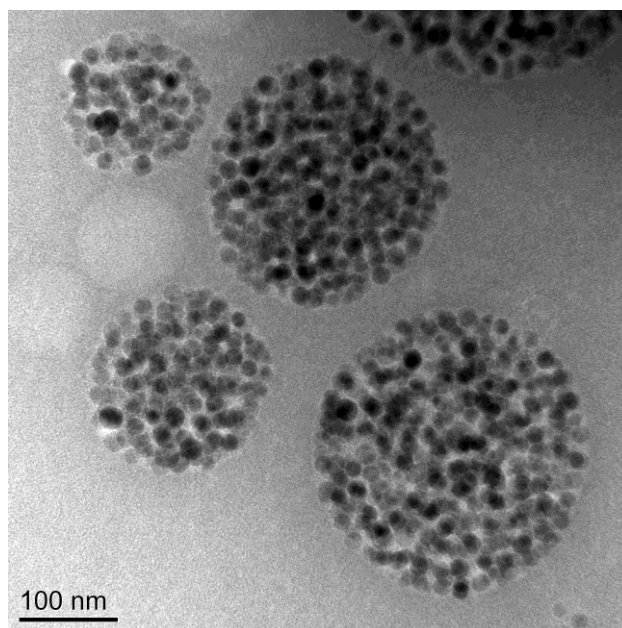

**Figure S13.** TEM image of Fe<sub>3</sub>O<sub>4</sub> nanoparticles in the Sylgard film, showing particle agglomeration upon polymer curing. The spherical shape of the clusters suggests solvent evaporation from the carrier aerosol droplet

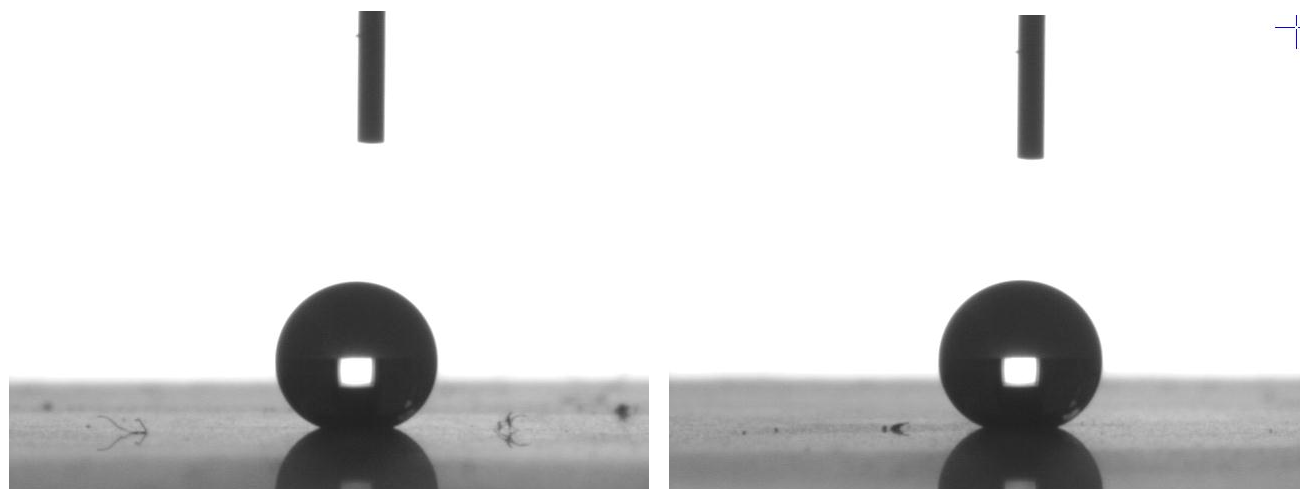



**Figure S14.** Example of a water contact angle measurement of a plain Sylgard-184 film (left) and the CoO/Sylgard film (right)
